# Supplementary material
Source: MDPI journal article supplement (https://www.mdpi.com/2073-4395/3/1/135)
Supplement: s1 [file s1]

Supplementary

**Table 1.** List of germplasm by genotype, including their pedigrees, grain color and
release notes.

| **Genotype b** | **Pedigree** | **Grain**  **Color c** | **Release** |
| --- | --- | --- | --- |
| 1 | B104/CML285-B-2-B-B-B-B-B | Y | TBR d |
| 2 | Tx770/CML288-B-3-B-B-B-B-B a | Y | TBR |
| 3 | (CML 408/B104)-B-2-1-B-B-B-B | Y | TBR |
| 4 | ((CML 408/B104) × (CML 411/B104))-1-1-B-B-B-B | Y | TBR |
| 5 | ((CML 325/B104) × (CML285/B104))-2-2-B-B-B-B | Y | TBR |
| 6 | ((B104/NC300) × (CML 415/B104))-4-1-B-B-B-B | Y | TBR |
| 7 | (B104/NC300)-B-1-B1-B-B-B-B | Y | TBR |
| 8 | (CML285/B104)-B-4-B-B-B-B-B-B | Y | TBR |
| 9 | (CML288/NC300)-B-9-B1-B-B-B-B-B | Y | TBR |
| 10 | (B97x CML 326-B/Tx770 × A645)-2-2-B-B-B-B-B-B | Y | TBR |
| 11 | (NC300 × Tx714-B/B104-1/CML343)-2-1-B-B-B-B-B-B | Y | TBR |
| 12 | (B104-1 × Tx714-B/B110 × FR2128-B)-12-4-B-B-B-B-B-B | Y | TBR |
| 13 | (Tx601 × B104-B/FR2128 × Unknown)-2-2-B-B-B-B-B | Y | TBR |
| 14 | (B104-1 × Tx714-B-B)-1-5-B-B-B-B-B-B | Y | TBR |
| 15 | BS13(S)C8-11-1-B-B-B-B-B-B-B | Y | TBR |
| 16 | Ark 536-B-B-B-B-B-B | Y | TBR |
| 17 | ((Tx772 × Tx745) × Tx745)-3-3-B-B-B-B-B-B | Y | TBR |
| 18 | ((Tx772 × T246) × Tx772)-1-5-B-B-B-B-B-B | Y | [1] |
| 19 | AR16021:S08a02 Derived line (energy dense)-B-B-B-1-B-B-B-B-B | Y | TBR |
| 20 | (P69Qc3HC107-1-1#-4-2#-4-B-B-1-4-B-B-B-B-B X CML 193)-B-B-2-B-B-B-B-1 | Y | TBR |
| 21 | Pop. 69 Templado Amarillo QPM-B-B-B2-12-B-B-B-B-B | Y | TBR |
| 22 | Tx772W | W | TBR |
| 23 | CML78 × CML269-B-B-B-B-B | W | TBR |
| 24 | (Tx114 (B73w)-B × CML343/Tx110 × Pop24)-B-B-B-4-B-B-B-B-B | W | TBR |
| 25 | CML311-B/CI66-B/Tx114 (B73w)-B xCML343)-B-B-B-1-B-B-B-B-B | W | TBR |
| 26 | CML311-B/CI66-B/Tx114 (B73w)-B xCML343)-B-B-B-2-B-B-B-B-B | W | TBR |
| 27 | CML269/TX130-B-B-B-5-1-B-B-B-B-B-B | W | TBR |
| 28 | CML269/TX130-B-B-B-1-3-B-B-B-B-B | W | TBR |
| 29 | CML269/TX114-B-B-B-1-1-B-B-B-B-B | W | TBR |
| 30 | (Lfy2361-B/Tx114 (B73w)-B Dark blue-B)Tx114/Lfy2304-B-B-B-1-3-B-B-B-3-B | B | TBR |
| 31 | Ethiopia12-B-3-3-B-B2-B1-2-B | B | TBR |
| 32 | BLUE1 | B | TBR |
| 33 | BLUE2 | B | TBR |
| 34 | Red Ear 2-2-2-1-1-2-B | R | TBR |
| 35 | Red Ear 5-2-4-1-4-1-B | R | TBR |
|  | Released Inbred Lines |  |  |
| 36 | B104-1-B-B-B-B-B-B-B-B-B | Y | [2] |

**Table 1.** *Cont*.

| **Genotype b** | **Pedigree** | **Grain**  **Color c** | **Release** |
| --- | --- | --- | --- |
| 37 | Ark 536-B-B-B-B-B-B | Y |  |
| 38 | CML325-B-B-B-B-B-B-B-B-B | Y |  |
| 39 | NC280-B-B-B-B-B-B | Y |  |
| 40 | DKB830:S19(entry 96)-B-B-B-9-B-B-B-B-B-B-B | Y |  |
| 41 | EX66: DK888 N11 bulk selfs-B-B-B-B-B-B-B-B | Y |  |
| 42 | B73-B-B-B-B-B-B-B-B | Y | [3] |
| 43 | Tx772-B-B-B-B-B | Y | [4] |
| 44 | Tx714-B-B-B-B-B-B-B | Y | [5] |
| 45 | Tx732-B-B-B-B-B-B-B | Y | [6] |
| 46 | Tx6252-B-B-B-B-B-B-B | Y |  |
| 47 | Tx760-B-B-B-B-B-B-B | Y |  |
| 48 | Tx770-B-B-B-B-B-B | Y | [7] |
| 49 | Tx771-B-B-B-B-B-B-B | Y |  |
| 50 | FR2128-B-B-B-B-B-B-B | Y |  |
|  | Lines from Dr. Wenwei Xu (Lubbock, TX, USA) |  |  |
| 51 | S2B73 | Y |  |
| 52 | C3A632-1A | LYD |  |
| 53 | C2A554-4 | LYSD |  |
| 54 | S2B73BC | Y |  |
| 55 | AR03056:N0902-1 | Y |  |
| 56 | C3S1B73-1 | YSD |  |
| 57 | C3S1B73-3-3 | YD |  |
| 58 | C3S1B73-3-1 | YD |  |
| 59 | C3W64A-1 | YF |  |
| 60 | B5C2 | LYF |  |
| 61 | Tx204 (Xu and Odvody 2004) | YD | [8] |
| 62 | Tx205 (Xu and Odvody 2004) | YD | [8] |
|  | 2009 Inbred Checks |  |  |
| 63–66 | LH195 (Monsanto Company 1991) | Y | [9] |
| 67–70 | LH287 (Monsanto Company 2001) | Y | [10] |
|  | 2010 Hybrid Checks | Y |  |
| 63 | P31G66 | Y | check |
| 64 | BH9440W | Y | check |
| 65–68 | LH195/LH287 | Y | check |
| 69 | (CML285/B104)-B-4-B-B-B-B-B-B | Y | check |
| 70 | Red | R |  |

a Tx # is a number assigned to germplasm at TAMU and is used for pedigree identification and releases; b Genotypes 1-62 were crossed to a hybrid parent (LH195/LH287) that were screened in 2010; c Grain colors: yellow (Y), white (W), red (R), blue (B), yellow dent (YD), yellow flint (YF) and southern dent (SD); d TBR-Elite lines to be released by Texas A&M/Texas AgriLife Research.

References

1. Mayfield, K.; Betrán, F.J.; Isakeit, T.; Odvody, G.; Murray, S.C.; Rooney, W.L.; Landivar, J.C. Registration of maize germplasm lines Tx736, Tx739, and Tx740 for reducing preharvest aflatoxin accumulation. *J. Plant Registrat.* **2012**, *6*, 88–94.

2. Hallauer, A.R.; Lamkey, K.R.; White, P.R. Registration of five inbred lines of maize: B102, B103, B104, B105, and B106. *Crop Sci.* **1997**, *37*, 1405–1406.

3. Russell, W. Registration of B70 and B73 Parental Lines of Maize1 (Reg. Nos. PL16 and PL17). *Crop Sci.* **1972**, *12*, 721–721.

4. Llorente, C.; Fojt, F.; Bockholt, A.; Betrán, F. Registration of Tx772 maize. *Crop Sci.* **2004**, *44*, 1036–1037.

5. Betrán, F.; Fojt, A.; Mayfield, F.; K Pietsch, D. Registration of Tx714 maize germplasm line. *Crop Sci.* **2004**, *44*, 1028.

6. Betrán, F.J.; Bockholt, A.; Fojt, F.; Mayfield, K. Registration of Tx732 maize germplasm line. *Crop Sci.* **2004**, *44*, 1028–1029.

7. Betrán, F.J.; Bockholt, A.; Fojt, F.; Mayfield, K. Registration of Tx770 maize germplasm line. *Crop Sci.* **2004**, *44*, 1029–1030.

8. Xu, W.; Odvody, G.; Williams, W.P. Tx204 and Tx205 inbred lines. In *Germplasm Enhancement of Maize (GEM)*, Annual Report; USDA-ARS: Lubbock, TX, USA, 2004. Available online: http://www.public.iastate.edu/~usda-gem/GEM_Annual_Reports/GEM_AR_04.htm#SCA (accessed on 6 February 2013).

9. Foley, T.J. Inbred corn line LH195. U.S. Patent No. 5,059,745, 22 October 1991.

10. Foley, T.J. Inbred corn line LH287. U.S. Patent No. 6,281,414, 28 August 2001.

© 2013 by the authors; licensee MDPI, Basel, Switzerland. This article is an open access article distributed under the terms and conditions of the Creative Commons Attribution license (http://creativecommons.org/licenses/by/3.0/).
